# Supplementary material for: Anion-polarisation-directed short-range-order in antiperovskite Li2FeSO
Source: Royal Society of Chemistry journal article supplement (doi:10.1039/d2ta10037a), 2023-01-01
Supplement: d2ta10037a1.pdf [file d2ta10037a1.pdf]

## Supplementary Information: Anion-polarisation-directed short-range-order in antiperovskite $\text{Li}_2\text{FeSO}$

Samuel W. Coles,<sup>1,2,\*</sup> Viktoria Falkowski,<sup>3,2</sup> Harry S. Geddes,<sup>3,2</sup> Gabriel E. Pérez,<sup>4,2</sup> Samuel G. Booth,<sup>5,2</sup> Alexander G. Squires,<sup>1,6,2</sup> Conn O'Rourke,<sup>1,2</sup> Kit McColl,<sup>1,2</sup> Andrew L. Goodwin,<sup>3,2</sup> Serena A. Cussen,<sup>5,2</sup> Simon J. Clarke,<sup>3,2</sup> M. Saiful Islam,<sup>1,7,2</sup> and Benjamin J. Morgan<sup>1,2,†</sup>

<sup>1</sup>Department of Chemistry, University of Bath, Claverton Down, BA2 7AY, United Kingdom

<sup>2</sup>The Faraday Institution, Quad One, Harwell Science and Innovation Campus, Didcot, OX11 0RA, United Kingdom

<sup>3</sup>Department of Chemistry, University of Oxford,

Inorganic Chemistry Laboratory, Oxford OX1 3QR, United Kingdom

<sup>4</sup>ISIS Neutron and Muon Source, STFC Rutherford Appleton Laboratory, Didcot OX11 0QX, United Kingdom

<sup>5</sup>Department of Materials Science and Engineering,

University of Sheffield, Sheffield S1 3JD, United Kingdom

<sup>6</sup>Department of Chemistry, University College London, London WC1H 0AJ, United Kingdom

<sup>7</sup>Department of Materials, University of Oxford, Oxford, OX1 3PH, United Kingdom

(Dated: March 25, 2023)

### INTEGRATED CRYSTAL ORBITAL BOND INDEX (ICOBI) ANALYSIS

In the main manuscript we report a preference for *cis*- $\text{OLi}_2\text{Fe}_4$  over *trans*- $\text{OLi}_2\text{Fe}_4$  oxygen coordination in  $\text{Li}_2\text{FeSO}$ . Many heteroanionic materials exhibit a similar preference for *cis* coordination of anions, which is often attributed to *cis* coordination giving a stronger covalent interaction between anions and transition metal ions, due  $\pi$ -bonding between anion p and transition-metal d orbitals [1–6]. Here, we characterise the degree of “covalency” in  $\text{Li}_2\text{FeSO}$  by calculating integrated crystal orbital bond index (ICOBI) values [7] for the three exemplar structures described in the main manuscript (Table. I). Smaller ICOBI values indicate more “ionic” bonding. The absolute ICOBI values are similar to those calculated for  $\text{LiCl}$ , indicating that  $\text{Li}_2\text{FeSO}$  is highly ionic [7]. By comparison, the  $\text{Ti-O}$  bonds in  $\text{BaTiO}_3$  have an ICOBI value 3 times higher than we obtain for  $\text{Li}_2\text{FeSO}$  [7]. This high ionic bond-character is consistent with our proposal that the preferential *cis*- $\text{OLi}_4\text{Fe}_2$  short-range ordering in  $\text{Li}_2\text{FeSO}$  is directed by electrostatics—specifically, anion-polarisation of anions with polar coordination environments, with a resulting electrostatic stabilisation of these coordination motifs.

| Structure               | $r(\text{Fe-X}) / \text{Å}$ | ICOBI (Fe-O) |
|-------------------------|-----------------------------|--------------|
| <i>trans</i> low-energy | 1.97                        | 0.23         |
| <i>cis</i> high-energy  | 1.96                        | 0.25         |
| <i>cis</i> ground-state | 1.99                        | 0.22         |

TABLE I. Iron–oxygen bond lengths and ICOBI values for the different structures of interest.

### PROJECTED DENSITIES OF STATES

Fig. 1 shows projected densities of electronic states (pDOS) for the three exemplar  $\text{Li}_2\text{FeSO}$  structures analysed in the main manuscript.

### ENERGETIC DIFFERENCES DUE TO MAGNETIC ORDERING

Table. II lists the energy differences between ferromagnetic (FM) and antiferromagnetic (AFM) spin configurations for the three exemplar structures discussed in the main manuscript.

| Structure               | $\Delta E_{\text{FM} \rightarrow \text{AFM}} / \text{meV atom}^{-1}$ |
|-------------------------|----------------------------------------------------------------------|
| <i>trans</i> low-energy | -7.2                                                                 |
| <i>cis</i> high-energy  | -10.0                                                                |
| <i>cis</i> ground-state | -8.4                                                                 |

TABLE II. Stabilisation energy for AFM versus FM spin ordering,  $\Delta E_{\text{FM} \rightarrow \text{AFM}}$ , for the three exemplar  $\text{Li}_2\text{FeSO}$  structures analysed in the main text.

\* swc57@bath.ac.uk

† b.j.morgan@bath.ac.uk

- [1] R. L. Withers, F. Brink, Y. Liu, and L. Noren, Cluster chemistry in the solid state: Structured diffuse scattering, oxide/fluoride ordering and polar behaviour in transition metal oxyfluorides, *Polyhedron* **26**, 290 (2007).
- [2] M. Yang, J. Oró-Solé, J. A. Rodgers, A. B. Jorge, A. Fuertes, and J. P. Attfield, Anion order in perovskite oxynitrides, *Nature Chem.* **3**, 47 (2010).
- [3] J. P. Attfield, Principles and applications of anion order in solid oxynitrides, *Crys. Grow. Des.* **13**, 4623 (2013).
- [4] J. K. Harada, N. Charles, K. R. Poeppelmeier, and J. M. Rondinelli, Heteroanionic materials by design: Progress

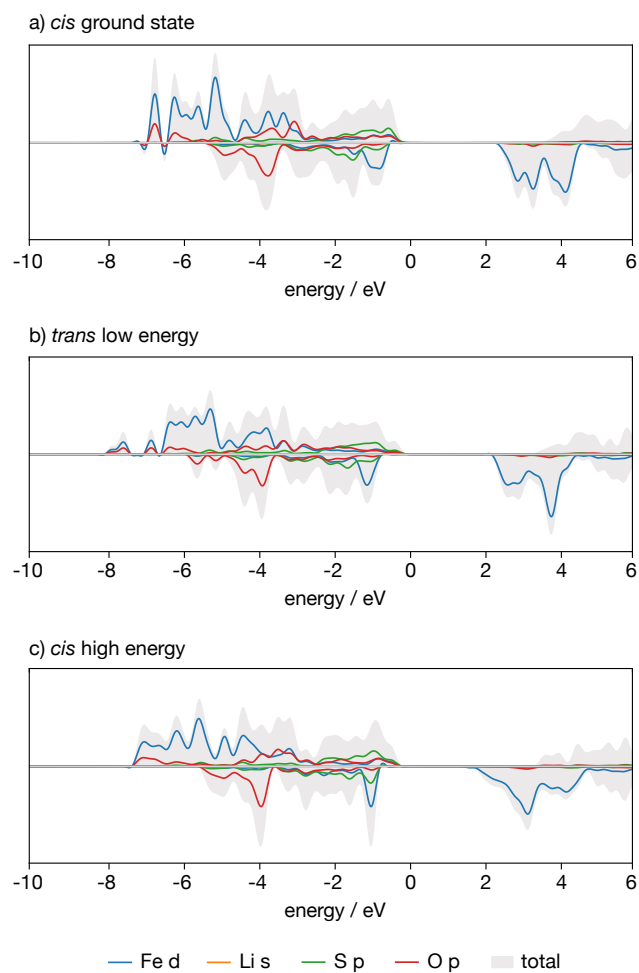

FIG. 1. Projected densities of states (pDOS) of the *cis* ground state structure (top panel), *cis* high-energy structure (middle panel), and *trans* low-energy structure (bottom panel).

toward targeted properties, *Adv. Mater.* **31**, 1805295 (2019).

- [5] H. Wolff and R. Dronskowski, First-principles and molecular-dynamics study of structure and bonding in perovskite-type oxynitrides  $ABO_2N$  ( $A = \text{Ca, Sr, Ba}$ ;  $B = \text{Ta, Nb}$ ), *J. Comput. Chem.* **29**, 2260 (2008).
- [6] C. Legein, B. J. Morgan, M. Body, W. Li, M. Burbano, M. Salanne, T. Charpentier, O. J. Borkiewicz, and D. Dambournet, Correlated anion-disorder in heteroanionic cubic  $\text{TiOF}_2$  (2022), in preparation.
- [7] P. C. Müller, C. Ertural, J. Hempelmann, and R. Dronskowski, Crystal orbital bond index: Covalent bond orders in solids, *J. Phys. Chem. C* **125**, 7959 (2021).
